# Supplementary material for: Selective BRAFV600E Inhibition Enhances T-Cell Recognition of Melanoma without Affecting Lymphocyte Function
Source: Oxford University Press journal article supplement (doi:10.1158/0008-5472.can-10-0118), 2010-06-15
Supplement: 00085472can100118-sup-sfig_2.pdf [file 00085472can100118-sup-sfig_2.pdf]

## Boni et al, supplementary figure 2

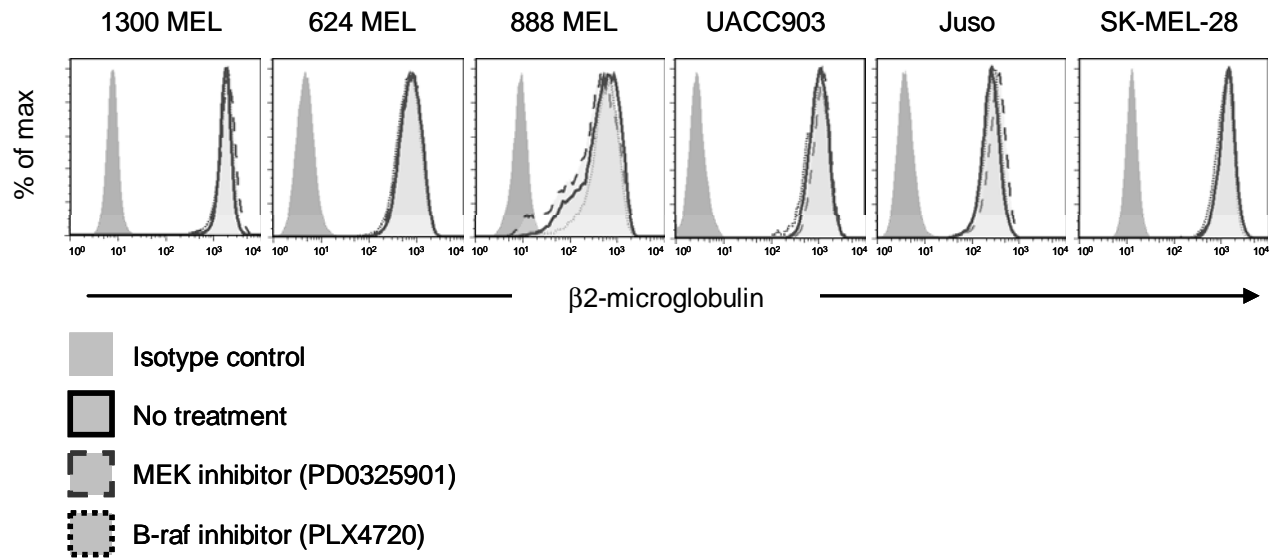

**Supplementary figure 2. MHC class I expression levels after treatment with MEK or B-raf inhibitors.** Melanoma cell lines were treated for 72 hours with PD0325901 (0.1  $\mu$ M) or with PLX 4720 (1  $\mu$ M) or left untreated as a control. Expression of MHC class I was assessed by flow cytometry using an anti-beta-2-microglobulin antibody. No difference was observed between the different groups in regard to MHC class I expression.
